# Supplementary material for: Multifunctional Ginger Nanofiber Hydrogels with Tunable Absorption: The Potential for Advanced Wound Dressing Applications
Source: PubMed Central journal article supplement (PMC8382245; doi:10.1021/acs.biomac.1c00215), 2021-07-13
Supplement: bm1c00215_si_001.pdf [file bm1c00215_si_001.pdf]

# Multifunctional Ginger Nanofiber Hydrogels with Tunable Super Absorption: The Potential for Advanced Wound Dressing Applications

*Paula Squinca<sup>†,^||</sup>, Linn Berglund<sup>†,\*</sup>, Kristina Hanna<sup>‡</sup>, Jonathan Rakar<sup>‡</sup>, Johan Junker<sup>‡</sup>, Hazem Khalaf<sup>§</sup>, Cristiane S. Farinas<sup>^||</sup> and Kristiina Oksman<sup>†,∇</sup>*

<sup>†</sup>Division of Materials Science, Department of Engineering Sciences and Mathematics, Luleå University of Technology, SE-971 87 Luleå, Sweden

<sup>‡</sup>Center for Disaster Medicine and Traumatology, Department of Biomedical and Clinical Sciences, Linköping University, SE-581 85 Linköping, Sweden

<sup>§</sup>Cardiovascular Research Centre, School of Medical Sciences, Örebro University, SE-703 62 Örebro, Sweden

<sup>^</sup>Embrapa Instrumentation, Rua XV de Novembro 1452, 13561-206, São Carlos, SP, Brazil

<sup>||</sup>Graduate Program of Chemical Engineering, Federal University of São Carlos, Rod. Washington Luís-km 235, 13565-905, São Carlos, SP, Brazil

<sup>∇</sup>Department of Mechanical & Industrial Engineering, University of Toronto, 5 King's College Road, Toronto, ON M5S 3G8, Canada.

## **Corresponding Author**

\*E-mail: [linn.berglund@ltu.se](mailto:linn.berglund@ltu.se)

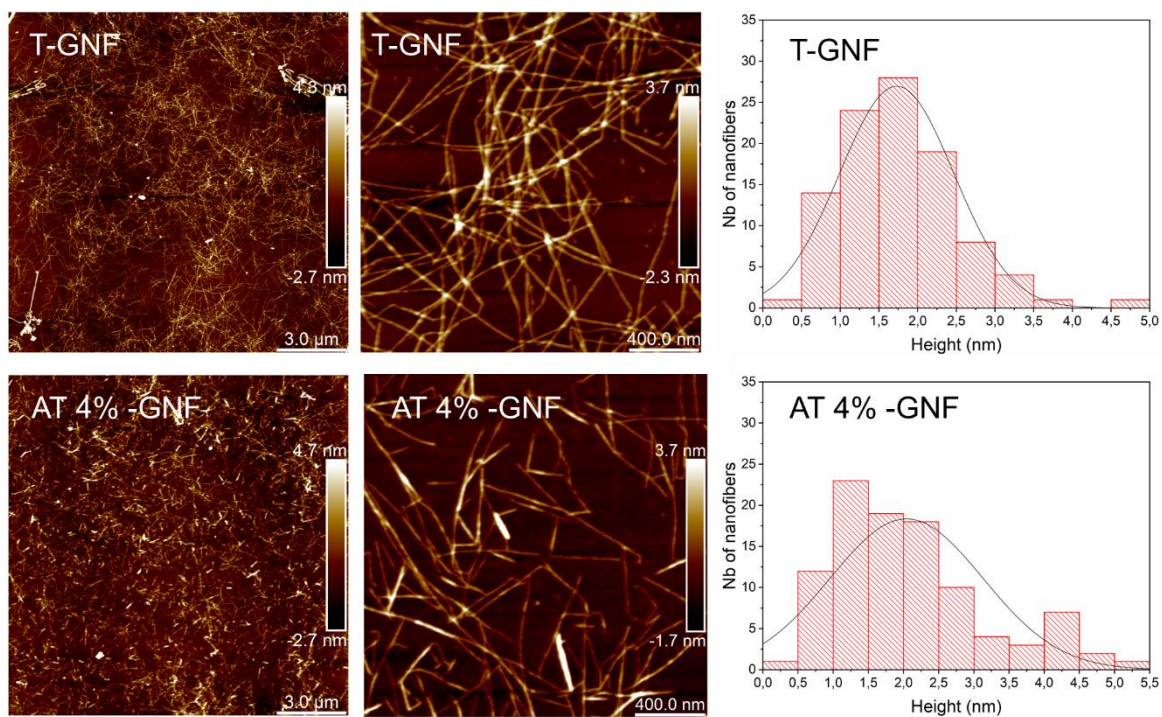

Figure S1. AFM height images and size distribution of the T-GNF and AT 4% -GNF, respectively.

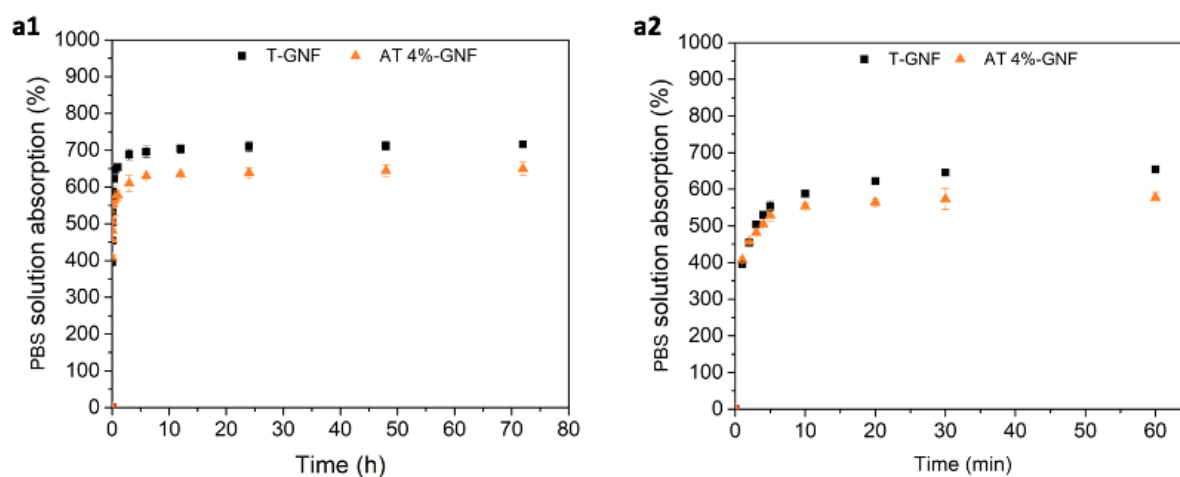

Figure S2. a1) Liquid absorption of the hydrogels ( $40 \text{ g m}^{-2}$ ) in PBS solution. a2) Expanded curves (first hour) of the liquid absorption of hydrogels in PBS solution.

Table S1. Hydrogel integrity in BSA solution.

| Hydrogel      | Days |                 |                 |                 |                 |                 |
|---------------|------|-----------------|-----------------|-----------------|-----------------|-----------------|
|               | 1    | 5               | 10              | 15              | 20              | 40              |
| T-GNF (%)     | 100  | $100.4 \pm 0.8$ | $101.7 \pm 2.2$ | $100.6 \pm 3.4$ | $102.1 \pm 3.5$ | $100.1 \pm 0.7$ |
| 4% AT-GNF (%) | 100  | $102.4 \pm 0.8$ | $105.7 \pm 4.6$ | $112.1 \pm 1.4$ | $103.4 \pm 1.9$ | $102.2 \pm 2.5$ |

Table S2. Hydrogel integrity in PBS solution.

| Hydrogel      | Days |                 |                 |                 |                 |                 |
|---------------|------|-----------------|-----------------|-----------------|-----------------|-----------------|
|               | 1    | 5               | 10              | 15              | 20              | 40              |
| T-GNF (%)     | 100  | $100.7 \pm 1.8$ | $101.0 \pm 0.7$ | $100.5 \pm 1.4$ | $100.2 \pm 0.4$ | $100.7 \pm 0.7$ |
| 4% AT-GNF (%) | 100  | $100.3 \pm 1.0$ | $100.6 \pm 0.7$ | $100.6 \pm 0.7$ | $100.3 \pm 1.3$ | $100.9 \pm 0.5$ |

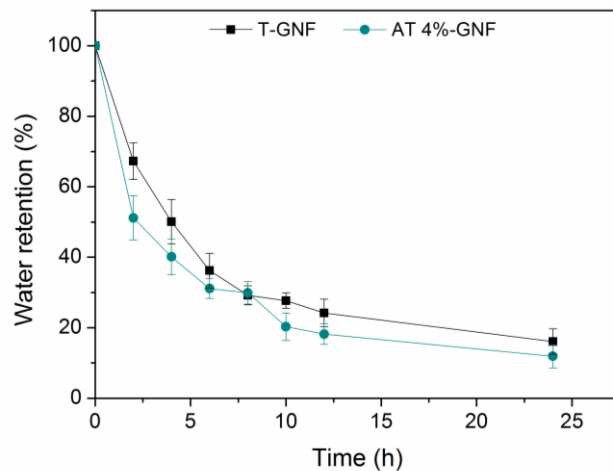

Figure S3. Water retention capacity of T-GNF and AT 4%-GNF hydrogels ( $40 \text{ g m}^{-2}$ ).

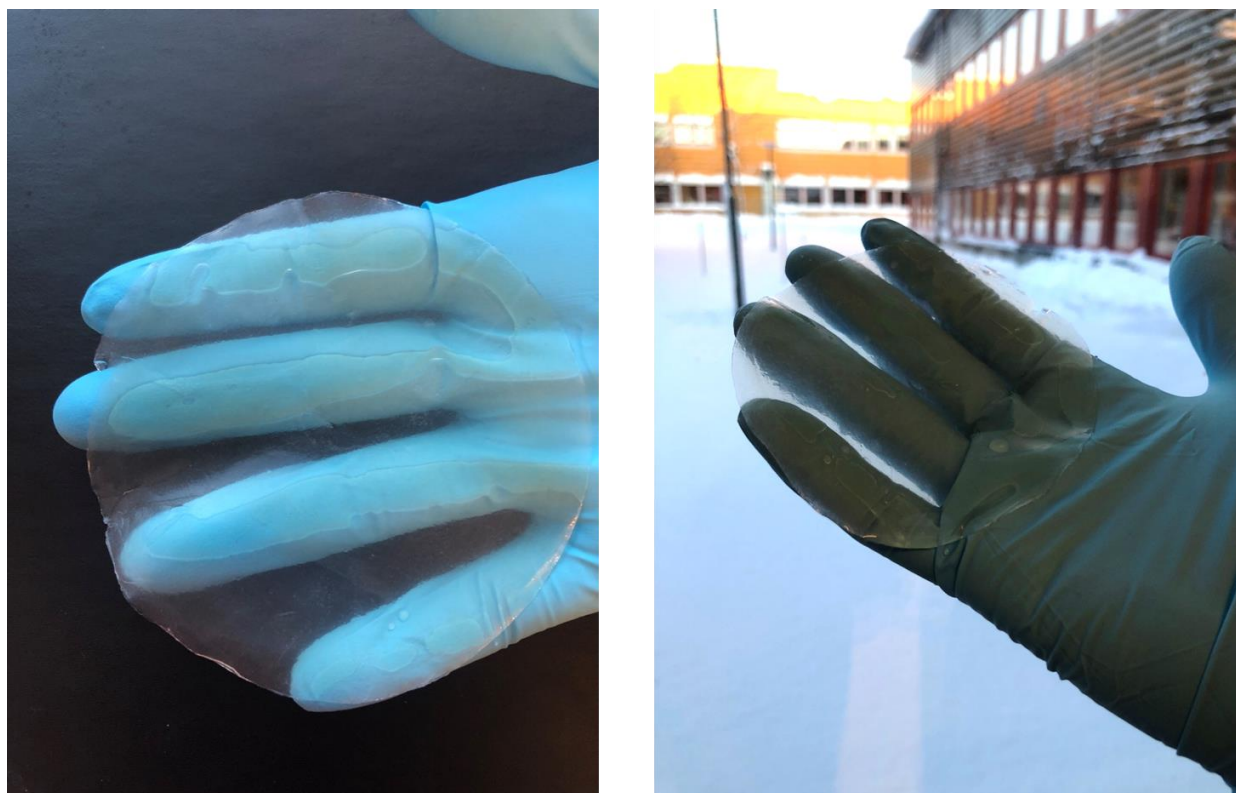

Figure S4. Photographs of the T-GNF hydrogels at  $40 \text{ g m}^{-2}$  after reaching the equilibrium state.

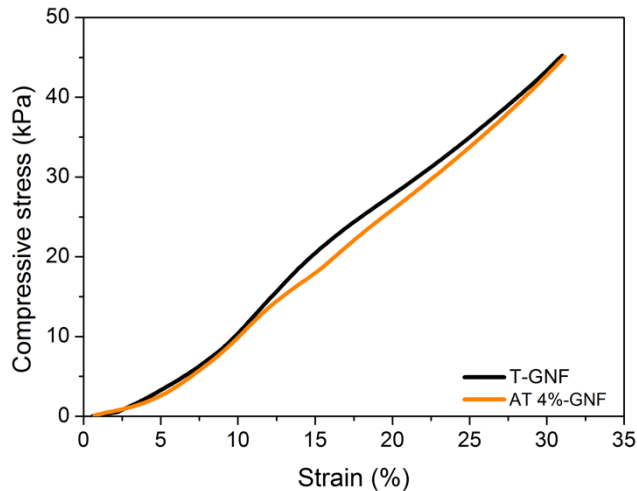

Figure S5. The representative compressive stress–strain curves enlarged at 30% strain.

Table S3. Mechanical properties of the hydrogels.

| Hydrogel  | Compressive Modulus (kPa) | Compressive strength (kPa) | E-modulus (MPa)         | Tensile strength (MPa) | Elongation at break (%) |
|-----------|---------------------------|----------------------------|-------------------------|------------------------|-------------------------|
| T-GNF     | 77.2 (1.6) <sup>a</sup>   | 445.9 (2.1) <sup>a</sup>   | 15.3 (0.5) <sup>a</sup> | 2.1 (0.2) <sup>a</sup> | 25.1 (1.4) <sup>a</sup> |
| AT 4%-GNF | 33.7 (4.7) <sup>b</sup>   | 210.5 (5.6) <sup>b</sup>   | 12.1 (0.1) <sup>b</sup> | 1.6 (0.1) <sup>b</sup> | 17.8 (1.0) <sup>b</sup> |

\*Average values with different superscript letters in the same column are significantly different at 5% significance level ( $p < 0.05$ ) based on ANOVA test. Results are expressed as the average value (Standard Deviation).

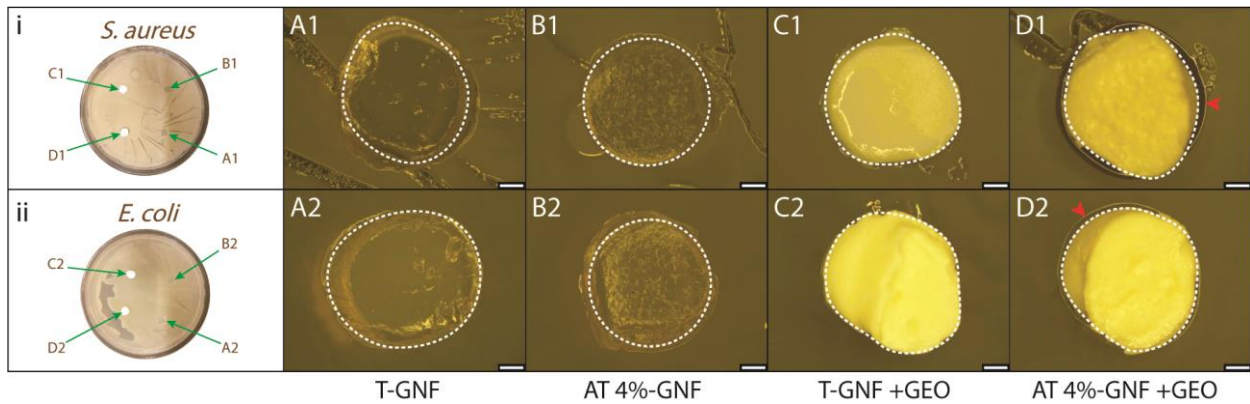

Figure S6. Overview images from microbiological assay for inhibition zones. Top row: i/1) *S. aureus* and bottom row ii/2) *E. coli*. A) T-GNF, B) AT 4%-GNF, C) T-GNF after functionalized with ginger essential oil (GEO), D) AT 4%-GNF with GEO. Red arrowheads indicate potential zone of inhibition. Dashed lines approximate hydrogel perimeters. Magnification 12.5x. (Scale bar: 1 mm).

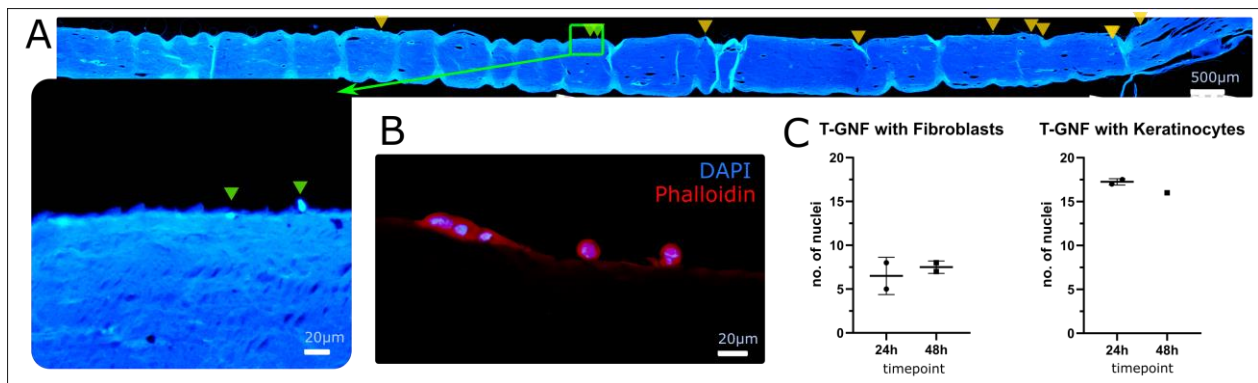

Figure S7. Investigation of cell attachment to the T-GNF hydrogel. A) acquired stitch at 10x magnification under UV-excitation along paraffin sectioned T-GNF hydrogel (~7 µm thick) with DAPI-labeled cells – inset: enlargement showing example of nuclei on the hydrogel surface (green arrowheads). B) Cells (keratinocytes shown) were labeled with DAPI and ALEXA546-conjugated Phalloidin. C) duplicate samples of fibroblasts and keratinocytes on T-GNF were quantified. Arrowheads indicate DAPI-stained nuclei.



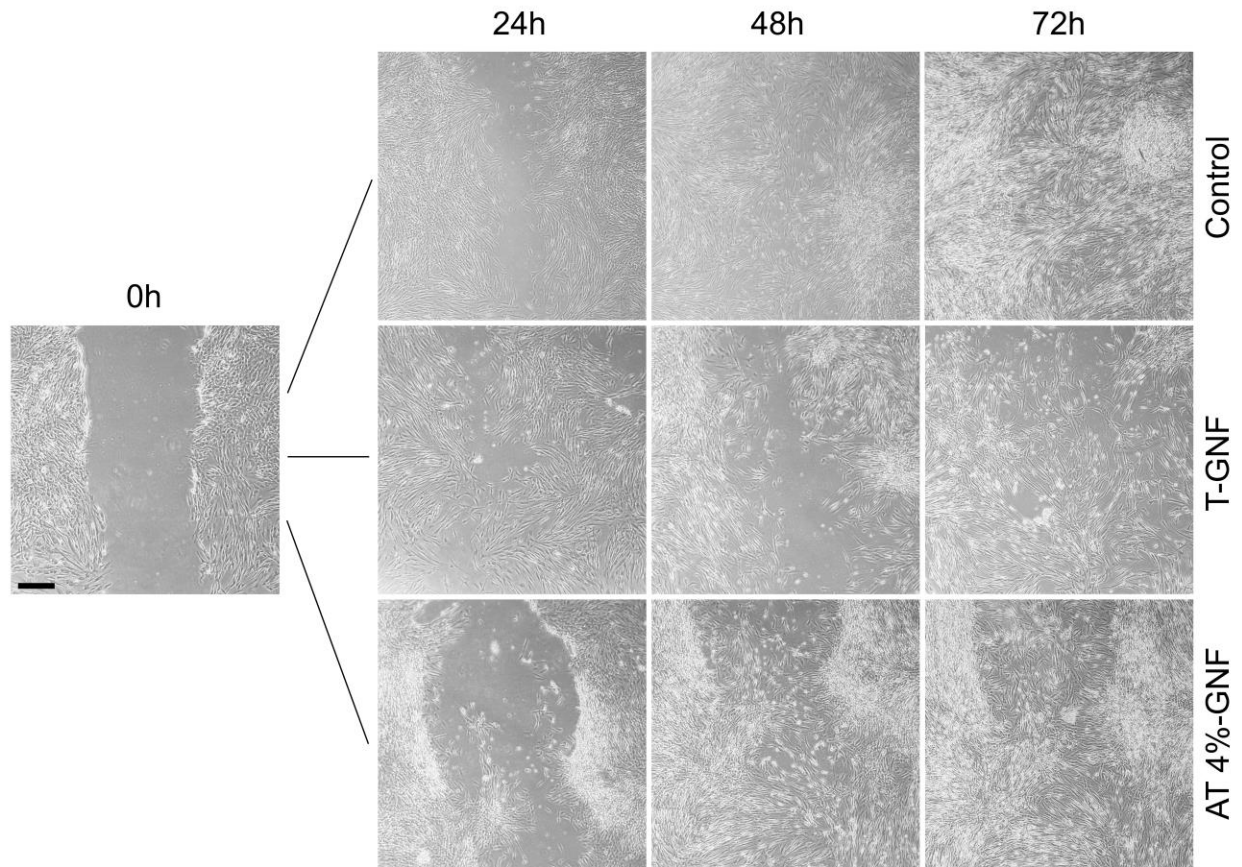

Figure S8. Images from scratch assay showing migration of fibroblasts at different time points. Scale bar corresponds to  $\sim 100\mu\text{m}$ .

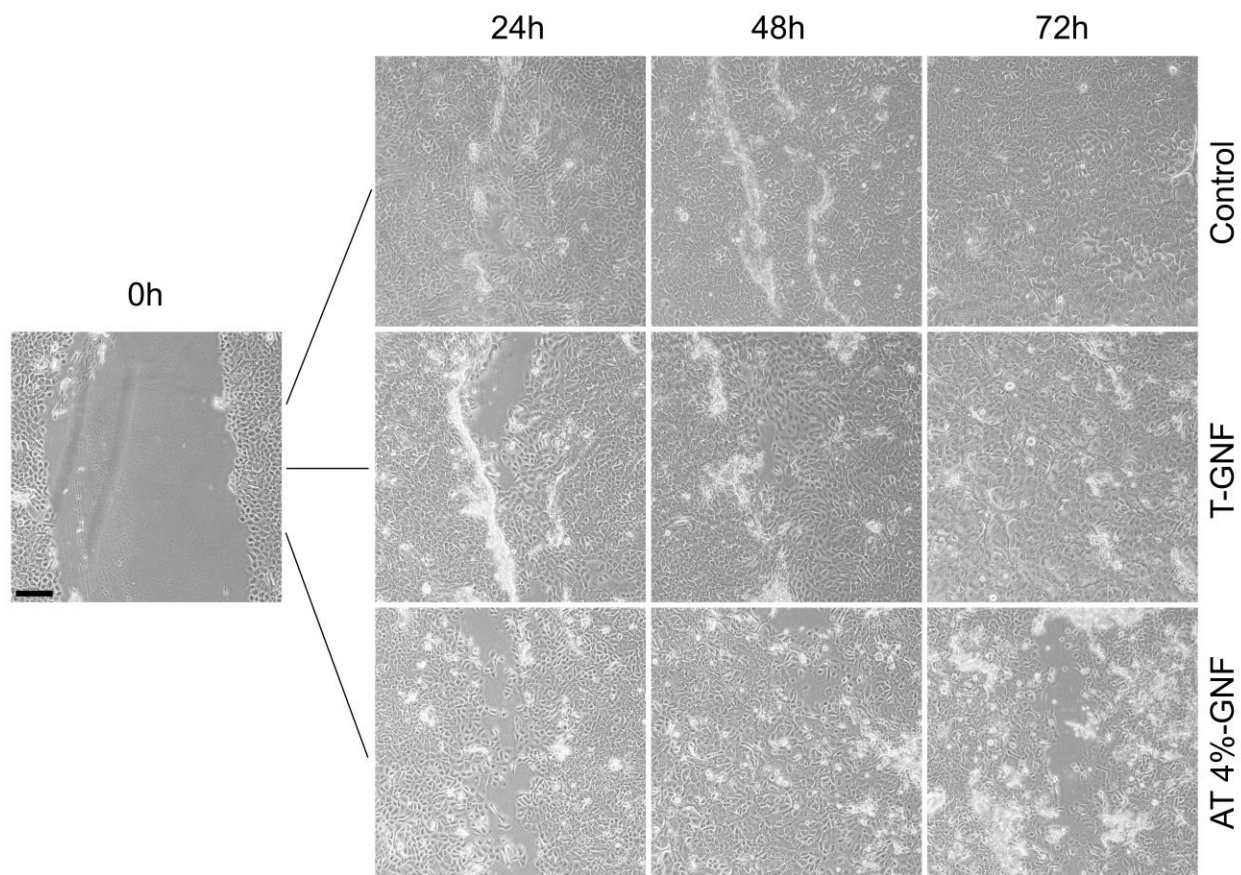

Figure S9. Images from scratch assay showing migration of keratinocytes at different time points. Scale bar corresponds to  $\sim 50\mu\text{m}$ .
